# Supplementary material for: Development of prognostic models for Health-Related Quality of Life following traumatic brain injury
Source: Qual Life Res. 2021 Jul 30;31(2):451–71. doi: 10.1007/s11136-021-02932-z (PMC8847302; doi:10.1007/s11136-021-02932-z)
Supplement: Supplementary file 11 — Supplementary file11 (DOCX 16 kb) [file 11136_2021_2932_MOESM11_ESM.docx]

| *QoLIBRI* | **Core Model** | **Extended Model** | **Full Model** |
| --- | --- | --- | --- |
| **Predictors** |  |  |  |
| **Constant** | 78 | 72 | 72 |
| **Pre-injury mental health problems (Nob)** |  |  |  |
| **Yes** | -9.9 (-12.0,-7.4 ) | -9.1 (-12.0, -6.6) | -8.8 (-11.0,-6.2 ) |
| **Education (College/Uni degreeb)** |  |  |  |
| **Currently in school** | -4.8 (-6.9, -2.7) | -4.6 (-6.7,-2.4) | -4.6 (-6.7, -2.4 ) |
| **None/Primary school** | -11.0(-14.0,-8.8) | -11.0(-13.0,-8.2) | -11.0(-13.0,-8.2) |
| **Secondary/high school** | -5.0 (-6.9, -3.0) | -4.6 (-6.5, -2.7 ) | -4.5 (-6.5, -2.6 ) |
| **Employment (Workingb)** |  |  |  |
| **Homemaker** | -11.0(-18, -4.7) | -8.8 (-15.0,-2.3) | -8.6(-15.0,-2.2 ) |
| **Student** | 1.6 (-1.3, 4.5 ) | -0.08(-3.3, 3.1 ) | -0.13 (-3.3, 3.0 ) |
| **Retired** | -0.40 (-2.2, 1.4 ) | 1.9 (-0.57,4.4 ) | 2.1 (-0.41,4.5) |
| **Unable to work/sick leave** | -11.0(-16.0,-6.6) | -9.5 (-14.0,-4.9) | -9.0 (-14.0,-4.4 ) |
| **Unemployed** | -8.2 (-12.0,-4.7) | -8.3 (-12.0,-4.9) | -8.1 (-12.0, -4.6) |
| **Injury cause (Road trafficb)** |  |  |  |
| **Incidental fall** |  | 3.1 ( 1.4, 4.8 ) | 3.1 ( 1.5, 4.8 ) |
| **Other non-intentional injury** |  | 3.2 ( 0.46, 5.9) | 3.2 ( 0.46, 5.9 ) |
| **Violence or Assault** |  | -1.2 (-4.9, 2.5 ) | -1.1 (-4.8, 2.6 ) |
| **Suicide attempt** |  | 3.4 (-4.2, 11.0) | 3.5 (-4.1, 11.0) |
| **GCS** |  | 0.63(0.45, 0.81) | 0.62 (0.44,0.80) |
| **ASA-PS (Healthy patientb)** |  |  |  |
| **Mild systemic disease** |  | -2.1 (-3.8,-0.31) | -1.9 (-3.7,-0.18 ) |
| **Severe systemic disease** |  | -7.5 (-10.0,-4.6) | -7.2 (-10.0,-4.3 ) |
| **Pre-injury substance abuse (Nob)** |  |  |  |
| **Yes** |  |  | -3.5 (-8.4, 1.5 ) |
| **Sex (Maleb)** |  |  |  |
| **Female** |  | -1.9 (-3.5,-0.36) | -1.9(-3.5,-0.33 ) |
| **Living arrangement (Togetherb)** |  |  |  |
| **Alone** |  |  | -1.4 (-3.2, 0.42) |
| **Mei (Nob)** |  |  |  |
| **Yes** |  | -2.8 (-4.4,-1.2 ) | -2.9 (-4.5, -1.3 ) |
| **Age (per decade)** |  | -0.69(-1.3,-0.04) | -0.71(-1.4,-0.06) |
| **R2 development cohort** | 0.10 | 0.15 | 0.15 |
| **R2 optimism** | 0.02c | 0.02 | 0.02 |
| **R2 after bootstrap validation** | - | 0.13 | 0.13 |

**Supplementary Table 4** *Regression coefficients and 95% confidence intervals for the Quality of Life after Traumatic Brain Injury (QoLIBRI) total score with multivariable linear regression analysis. Model performance indicated by explained variance (R2) and bootstrap validation for each model (N=2535a)*

Note: a The models were fitted with additional imputed six months outcome whenever three or twelve months outcomes were available.

b Reference category of categorical variable.

c Optimism of the core model is estimated to be similar to that of the extended model.

Core model = Education, employment type and pre-injury mental health problems.

Extended model = Core plus injury cause, GCS, ASA-PS, sex, MEI, and age.

Full model = Extended plus pre-injury substance abuse, and living arrangement.
