# Supplementary material for: Development of prognostic models for Health-Related Quality of Life following traumatic brain injury
Source: Qual Life Res. 2021 Jul 30;31(2):451–71. doi: 10.1007/s11136-021-02932-z (PMC8847302; doi:10.1007/s11136-021-02932-z)
Supplement: Supplementary file 15 — Supplementary file15 (DOCX 14 kb) [file 11136_2021_2932_MOESM15_ESM.docx]

| **Supplementary Table 8** Formulas of Health-Related Quality of Life models for the SF-36v2 physical (PCS) and mental (MCS) component summary score and the Quality of Life after Traumatic Brain Injury (QoLIBRI) total score six months post-injury | |
| --- | --- |
| *PCS* | |
| **Core model** |  |
| **Extended model** |  |
| **Full model** |  |
| *MCS* | |
| **Core model** |  |
| **Extended model** |  |
| **Full model** |  |
| *QoLIBRI* | |
| **Core model** |  |
| **Extended model** |  |
| **Full model** |  |
